# The American Journal of Psychiatry

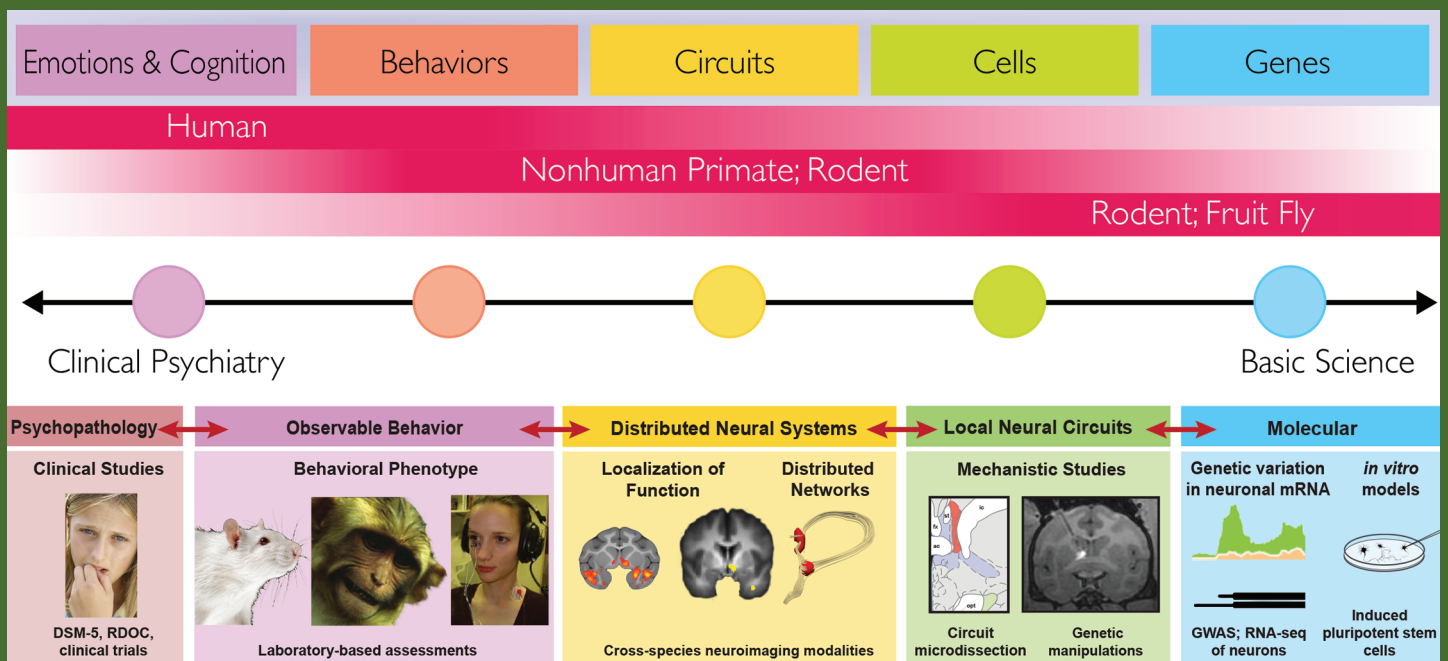

Integrating Clinical Psychiatry With Behavioral Neuroscience

TIME'S UP Healthcare: The Role of Mental Health

Correlates of Future Violence in People  
Being Treated for Schizophrenia

The Emergent Course of Bipolar Disorder:  
Observations Over Two Decades From the  
Canadian High-Risk Offspring Cohort
