## PERSPECTIVAS

### NOTA DEL EDITOR

- 675 Integración de la psiquiatría clínica y la neurociencia del comportamiento: Reflexiones y convocatoria de artículos**  
*Ned H. Kalin, M.D.*

### EDITORIALES

- 677 En busca de un nuevo paradigma para la investigación en violencia y esquizofrenia**  
*Paul S. Appelbaum, M.D.*
- 680 Depresión materna y desarrollo infantil: Indicios de los mecanismos causales a partir de potenciales variables de confusión**  
*Deanna M. Barch, Ph.D., Cynthia Rogers, M.D.*
- 683 Esquizofrenia y trastornos psicóticos inducidos por sustancias: Reflexiones de fisiopatología e implicaciones clínicas**  
*Rajiv Tandon, M.D., Sonia Motin Shariff, M.D.*
- 685 ¿Hay beneficios a largo plazo del tratamiento del TDAH con estimulantes?**  
*Steven R. Pliszka, M.D.*

### COMENTARIO

- 687 Atención sanitaria TIME'S UP (se agotó el tiempo): El papel de la salud mental**  
*Jessica A. Gold, M.D., M.S., et al.* **AUDIO**

### CONFERENCIA DE CASO CLÍNICO

- 690 Los clínicos y el sesgo cognitivo: Un caso de demencia frontotemporal diagnosticada erróneamente como trastorno de conversión**  
*Benjamin R. Braus, M.D., et al.*

## NUEVAS INVESTIGACIONES

### ARTÍCULOS

- 694 Correlatos de futura violencia en personas que están recibiendo tratamiento para la esquizofrenia**  
*Alec Buchanan, Ph.D., M.D., et al.* **EDITORIALE**  
La baja adherencia a la medicación, aunque no los síntomas iniciales de psicosis o depresión, predijeron violencia lesiva en individuos con esquizofrenia. Las estrategias de tratamiento para reducir el riesgo deben hacer énfasis en la adherencia a la medicación.
- 702 La exposición a los síntomas depresivos maternos en la vida fetal o la infancia y el desarrollo cerebral de los hijos: Un estudio de imágenes basado en la población**  
*Runyu Zou, B.Med., M.P.H., et al.* **EDITORIALE • EMC**  
La exposición a los síntomas maternos perinatales de depresión está asociada a diferencias cerebrales morfológicas en los hijos una década más tarde. El período perinatal, concretamente el período postnatal, puede ser crítico para la prevención de síntomas depresivos maternos en vista de su asociación al desarrollo cerebral del niño a largo plazo.
- 711 Predicción del inicio del trastorno psicótico inducido por sustancias y su progresión a esquizofrenia en una muestra nacional sueca**  
*Kenneth S. Kendler, M.D., et al.* **EDITORIALE • EMC**  
El trastorno psicótico inducido por sustancias ocurre en individuos con tendencia al abuso de drogas y alcohol y una vulnerabilidad familiar moderada a la psicosis. Una modesta proporción de individuos con trastorno psicótico inducido por sustancias desarrolla esquizofrenia.

**720 El curso emergente del trastorno bipolar: Observaciones durante dos décadas de la cohorte canadiense de hijos en alto riesgo**

Anne Duffy, M.D., F.R.C.P.C., et al. **EMC**

La progresión del trastorno bipolar en individuos con un historial familiar de la enfermedad puede observarse a través de la psicopatología a nivel tanto de síntomas como de síndrome. Los problemas de sueño y la ansiedad en la infancia pueden ser factores predictores importantes.

**730 Insolubilidad de proteínas aumentada en el cerebro de un subgrupo de pacientes con esquizofrenia**

Leslie G. Nucifora, Ph.D., et al.

Los autores identificaron insolubilidad de proteínas aumentada y la ubiquitinación de proteínas aumentada en el cerebro de un subgrupo de pacientes con esquizofrenia. Los resultados apoyan la hipótesis que la insolubilidad de proteínas ocurre en un subgrupo de pacientes con esquizofrenia.

**744 Dominios neurofuncionales derivados de la fenotipificación comportamental profunda en el trastorno por abuso de alcohol**

Laura E. Kwako, Ph.D., et al. **VIDEO**

Los datos de medidas clínicas, basadas en el comportamiento y auto-reportadas se ajustan a un modelo de adicción al alcohol, basado en la neurociencia. Dicho modelo enfatiza el papel de la importancia de los incentivos, la emocionalidad negativa y la función ejecutiva en la adicción.

**754 Los beneficios continuados del metilfenidato en TDAH después de 2 años en consulta clínica: Un ensayo de discontinuación, aleatorizado y controlado con placebo**

Anne-Flore M. Matthijssen, M.Sc., et al. **EDITORIALE • VIDEO**

El tratamiento con metilfenidato en niños y adolescentes con trastorno por déficit de atención e hiperactividad puede seguir siendo efectivo después de 2 años de uso, y los efectos del tratamiento pueden ser superiores en los niños más pequeños. A algunos pacientes individuales se les puede quitar el metilfenidato sin deterioro.

**COMUNICADOS Y ACTUALIZACIONES**

**CARTAS AL EDITOR**

**763 Alta prevalencia de la depresión periparto e madres médicas: Un estudio transversal**

Esther K. Choo, M.D., M.P.H., et al.

**764 [Corrections to Kennard et al., Pham et al., Brent et al.]**

**ACTOS OFICIALES DE LA APA**

**765 Aspectos psiquiátricos de la infertilidad**

Madeleine A. Becker, M.D., et al.

**OTROS TEMAS DE INTERÉS**

**767 Educación Médica Continuada**

**Cubierta:** [An illustrative schematic of the translational research approach, portraying a hypothetical integrative framework for studying the neural and genetic bases of psychopathology. Images provided by Dr. Drew Fox (University of California–Davis) and Drs. Rothem Kovner, Lisa Williams and Jonathan Oler (University of Wisconsin–Madison).]

**AUDIO** Article is highlighted in AJP Audio, a downloadable .mp3 file available at [ajp.psychiatryonline.org](http://ajp.psychiatryonline.org)

**EDITORIALE** Article is discussed in one of the issue's editorials

**EMC** A course covering the content of this article is available online for paid subscribers to the AJP CME Course program

**VIDEO** Article is highlighted online by Deputy Editor Daniel S. Pine, M.D.

**La Tabla de Contenidos y resúmenes de Este Número Está Disponible en Español**

(Abstracts are also available in Spanish)

Translation presented in collaboration with the Office of Global Health, Rutgers–Robert Wood Johnson Medical School. Support for this effort provided by ACTA Colombia.

**Translation courtesy of**

**Sergi Casals, M.A.**, Garuna, Medellín, Colombia ([www.garunaeditors.com](http://www.garunaeditors.com))

**Carlos López Jaramillo, M.D., M.Sc., Ph.D.**, Universidad de Antioquia, Medellín, Colombia

**Javier I. Escobar, M.D., M.Sc.**, Rutgers–Robert Wood Johnson Medical School

## Correlatos de futura violencia en personas que están recibiendo tratamiento para la esquizofrenia

Alec Buchanan, Ph.D., M.D., Kyaw Sint, M.P.H., Jeffrey Swanson, Ph.D., Robert Rosenheck, M.D.

**Objetivo:** El comportamiento violento es poco frecuente en individuos con esquizofrenia, pero clínicamente es importante. El propósito de este estudio fue brindar datos sobre los correlatos de violencia, que pueden permitir una mejor evaluación del riesgo y una mejor atención.

**Método:** Se examinaron un total de 1.435 individuos con esquizofrenia que participaban en el estudio de Ensayos Clínicos Antipsicóticos de Efectividad de la Intervención (CATIE, por sus siglas en inglés) del Instituto Nacional Estadounidense de Salud Mental (NIMH) y que se habían seguido por 18 meses. Las variables dependientes fueron la violencia lesiva y no lesiva auto-reportadas durante el seguimiento. Las variables independientes, evaluadas en el momento del ingreso al estudio, incluían la violencia lesiva y no lesiva de los participantes, las variables demográficas y de entorno, los factores de riesgo en la infancia, el estado clínico, las circunstancias actuales y el contacto reciente con hospitales y prisiones. Se utilizaron modelos de riesgos proporcionales de tiempo hasta la primera violencia lesiva, para generar cocientes de riesgo bivariantes y multivariantes para todos los participantes y, aparte, para los participantes que al inicio del estudio no habían reportado violencia lesiva.

**Resultados:** Setenta y siete participantes (5,4%) reportaron haber cometido violencia lesiva durante el seguimiento, y 119 (8,3%) reportaron haber participado exclusivamente en violencia no lesiva. En el análisis multivariable, la violencia lesiva

al inicio del estudio (cociente de riesgo [*hazard ratio*]=4,02), la reciente victimización violenta (*hazard ratio*=3,52), la gravedad del consumo de drogas (*hazard ratio*=2,93), la violencia no lesiva al inicio del estudio (*hazard ratio*=2,72), el abuso sexual en la infancia (*hazard ratio*=1,85), y la no adherencia a la medicación (*hazard ratio*=1,39) se asociaron a futura violencia lesiva. Para los participantes sin historial de violencia lesiva al momento de ingresar al estudio, el predictor más fuerte fue la violencia no lesiva al inicio del estudio (*hazard ratio*=3,02). La victimización reciente dejó de ser un correlato significativo. El resto de correlatos y la solidez de su asociación a futura violencia lesiva fueron similares a la de los otros participantes.

**Conclusiones:** Este es el primer análisis multivariable longitudinal de predictores de violencia lesiva en una cohorte grande de pacientes con esquizofrenia a los que se les ha hecho seguimiento durante 18 meses. Los resultados revelaron efectos fuertes simultáneos de la violencia lesiva al inicio del estudio y de la victimización reciente sobre el futuro comportamiento de violencia lesiva. Entre las variables clínicas, la baja adherencia a la medicación, pero no los síntomas de psicosis o depresión al inicio del estudio, predijeron violencia lesiva en individuos con esquizofrenia. Las estrategias de tratamiento para reducir el riesgo deben hacer énfasis en la adherencia a la medicación.

(*Am J Psychiatry* 2019; 176:694–701)

# La exposición a los síntomas depresivos maternos en la vida fetal o la infancia y el desarrollo cerebral de los hijos: Un estudio de cohorte basado en la población

Runyu Zou, B.Med., M.P.H., Henning Tiemeier, M.D., Ph.D., Jan van der Ende, M.Sc., Frank C. Verhulst, M.D., Ph.D., Ryan L. Muetzel, Ph.D., Tonya White, M.D., Ph.D., Manon Hillegers, M.D., Ph.D., Hanan El Marroun, Ph.D.

**Objetivo:** Los autores examinaron las asociaciones entre la exposición a los síntomas depresivos maternos en diferentes etapas del desarrollo desde la vida fetal hasta la adolescencia y el desarrollo cerebral del niño, incluyendo volumetría y la microestructura de la materia blanca.

**Método:** Este estudio fue parte de una cohorte de nacimiento longitudinal en Rotterdam, Holanda. Los participantes fueron 3.469 pares madre-hijo para los que se tenían datos de síntomas depresivos maternos y neuroimágenes del hijo a los 10 años. Los autores también evaluaron los problemas emocionales y actitudinales del hijo en el momento de las neuroimágenes. Se examinó la relación de los síntomas depresivos maternos con el desarrollo cerebral del hijo en cada evaluación. Las trayectorias de los síntomas depresivos maternos se modelaron en la vida fetal y la infancia para determinar la asociación de los patrones de síntomas depresivos maternos a lo largo del tiempo con el desarrollo cerebral del hijo.

**Resultados:** Los análisis en un solo punto del tiempo mostraron que los síntomas depresivos maternos a los 2 meses de edad del bebé estaban asociados a un volumen total inferior

de materia gris y a una menor anisotropía fraccional (AF) global, a diferencia de los síntomas depresivos maternos evaluados en el período prenatal o en la infancia, que no mostraron dicha asociación. Los análisis de las trayectorias sugirieron en particular que los hijos expuestos a niveles persistentemente altos de síntomas depresivos maternos durante el período prenatal tenían volúmenes de materia blanca inferiores y alteraciones (p.ej. FA inferior) en la microestructura de la materia blanca, en comparación con los niños que no habían sido expuestos a los mismos niveles de síntomas. Además, las diferencias de volumen de materia gris mediaron la asociación entre los síntomas depresivos maternos postnatales y los problemas de atención del hijo.

**Conclusiones:** Los síntomas depresivos maternos perinatales fueron consistentemente asociados al desarrollo cerebral de los hijos evaluado 10 años después. Estos resultados sugieren que el período postnatal es una ventana de vulnerabilidad para adversidades como los síntomas depresivos maternos.

*(Am J Psychiatry 2019; 176:702–710)*

## Predicción del inicio del trastorno psicótico inducido por sustancias y su progresión a esquizofrenia en una muestra nacional sueca

Kenneth S. Kendler, M.D., Henrik Ohlsson, Ph.D., Jan Sundquist, M.D., Ph.D., Kristina Sundquist, M.D., Ph.D.

**Objetivo:** El objetivo de este estudio fue aclarar la etiología del trastorno psicótico inducido por sustancias y su progresión a esquizofrenia en una muestra nacional sueca.

**Método:** Se hizo seguimiento durante un promedio de 84 meses a individuos con un registro de trastorno psicótico inducido por sustancias entre 1997 y 2015 en registros médicos nacionales (N=7.606). Se utilizaron datos de registros médicos, criminales y farmacéuticos de familiares desde primer hasta tercer grado para calcular las puntuaciones de riesgo familiar de psicosis no afectiva, abuso de drogas y trastorno por abuso de alcohol.

**Resultados:** Los individuos con trastorno psicótico inducido por sustancias tuvieron elevaciones altas del riesgo familiar estandarizado de abuso de drogas (+1,09; IC 95%=1,02; 1,15) y trastorno por consumo de alcohol (+0,98; IC 95%=0,93; 1,03) y elevaciones moderadas de riesgo de psicosis no afectiva (+0,35; IC 95%=0,30; 0,41). El riesgo acumulativo de progresión a esquizofrenia fue 11,3%; el más bajo fue para el trastorno psicótico inducido por alcohol y el más alto para el trastorno psicótico inducido por cannabis, y fue predicho por la corta edad en el momento del diagnóstico del trastorno psicótico, el sexo masculino y otros registros de episodios de abuso de droga, trastorno por consumo de alcohol y trastorno psicótico inducido por sustancias. Un modelo de predicción de riesgo encontró que 47% de los individuos que viraron

hacia la esquizofrenia estaban en el 20% de más alto riesgo. Las puntuaciones de riesgo familiar de trastorno por abuso de alcohol y abuso de droga no discriminaron de manera significativa entre aquellos que viraron hacia la esquizofrenia y los que no viraron, mientras que la puntuación de riesgo familiar de psicosis no afectiva sí los pudo discriminar (0,67; IC 95%=0,40; 0,95 versus 0,33; IC 95%=0,28; 0,39). Las puntuaciones de riesgo familiar de psicosis no afectiva fueron indistinguibles entre los individuos con esquizofrenia, con y sin previa psicosis inducida por sustancias. La asignación de jubilación temprana por la Agencia de la Seguridad Social de Suecia discriminó marcadamente entre los individuos con trastorno psicótico inducido por sustancias, con o sin esquizofrenia ulterior.

**Conclusiones:** El trastorno psicótico inducido por sustancias parece resultar de exposición sustancial a las drogas en individuos en riesgo familiar alto de abuso de sustancias y riesgo familiar moderadamente elevado de psicosis. El riesgo familiar de psicosis, pero no el abuso de sustancias, predice la progresión de la psicosis inducida por sustancias a esquizofrenia. La esquizofrenia subsiguiente a la psicosis inducida por sustancias probablemente es un trastorno precipitado por las drogas en individuos altamente vulnerables, y no un síndrome predominantemente causado por la exposición a las drogas.

(*Am J Psychiatry* 2019; 176:711–719)

## El curso emergente del trastorno bipolar: Observaciones durante dos décadas de la cohorte canadiense de hijos en alto riesgo

Anne Duffy, M.D., F.R.C.P.C., Sarah Goodday, Ph.D., Charles Keown-Stoneman, Ph.D., Paul Grof, M.D., Ph.D.

**Objetivo:** El objetivo de los autores fue describir el curso emergente del trastorno bipolar en hijos de padres afectados, agrupados en subgrupos según la respuesta de los padres a la profilaxis del litio.

**Método:** El trastorno bipolar de los padres se confirmó por el procedimiento de *best-estimate* y la respuesta al litio, siguiendo el protocolo de investigación. Los hijos en alto riesgo (N=279) y los sujetos control (N=87) fueron evaluados a ciegas, en promedio una vez al año con la versión *Kiddie Schedule for Affective Disorders and Schizophrenia–Present and Lifetime* o la versión *Schedule for Affective Disorders and Schizophrenia–Lifetime version*. Los diagnósticos del DSM-IV fueron confirmados utilizando el procedimiento de *best-estimate* en revisiones ciegas de consenso. La incidencia acumulativa y la edad mediana al inicio fueron determinadas por datos a lo largo de la vida a nivel de síndrome y de síntoma. Modelos mixtos evaluaron la asociación entre el curso clínico de los padres y el de los hijos. Se utilizó un modelo multiestado para estimar la trayectoria clínica a trastorno bipolar.

**Resultados:** La incidencia acumulativa del trastorno bipolar fue 24,5%, y la mediana de edad al inicio fue 20,7 años (rango entre 12,4 y 30,3). El curso clínico del progenitor afectado estuvo asociado al del hijo afectado. Los episodios depresi-

vos predominaron durante el curso bipolar temprano, especialmente en los hijos de los padres que respondieron al litio. Los trastornos del sueño y de ansiedad en la infancia predijeron de forma significativa un riesgo de trastorno de ánimo 1.6 a 1.8 veces más alto respectivamente, y los síntomas depresivos y maníacos predijeron un riesgo 2,7 y 2,3 veces más alto, respectivamente. El mejor modelo *best-fit* del trastorno bipolar emergente fue una secuencia progresiva desde antecedentes no específicos de la depresión adolescente durante la infancia, hasta el episodio maníaco o depresivo índice. Los síntomas de sueño subumbrales estuvieron asociados significativamente a la transición del bienestar a trastornos que no fueran del ánimo, y los síntomas psicóticos en los episodios de estado del ánimo estuvieron asociados significativamente a la transición de trastorno unipolar a trastorno bipolar.

**Conclusiones:** El trastorno bipolar en individuos con riesgo familiar se desarrolla como una secuencia clínica progresiva. Los trastornos de sueño y de ansiedad en la infancia son predictores importantes, igual que los síntomas del estado de ánimo clínicamente significativos y los síntomas psicóticos en los episodios depresivos.

(*Am J Psychiatry* 2019; 176:720–729)

## Insolubilidad de proteínas aumentada en el cerebro de un subgrupo de pacientes con esquizofrenia

Leslie G. Nucifora, Ph.D., Matthew L. MacDonald, Ph.D., Brian J. Lee, B.S., Matthew E. Peters, M.D., Alexis L. Norris, Ph.D., Benjamin C. Orsburn, Ph.D., Kun Yang, Ph.D., Kelly Gleason, M.S., Russell L. Margolis, M.D., Jonathan Pevsner, Ph.D., Carol A. Tamminga, M.D., Robert A. Sweet, M.D., Christopher A. Ross, M.D., Ph.D., Akira Sawa, M.D., Ph.D., Frederick C. Nucifora, Jr., Ph.D., D.O

**Objetivo:** Hay una alta probabilidad de que los mecanismos que conducen a la esquizofrenia sean diversos. Sin embargo, puede haber vías fisiopatológicas comunes para subtipos de la enfermedad. Los autores probaron la hipótesis que la insolubilidad y la ubiquitinación aumentadas de las proteínas subyacen a la fisiopatología de un subtipo de esquizofrenia.

**Método:** La corteza prefrontal y el giro temporal superior de cerebros postmortem de individuos con y sin esquizofrenia fueron sometidos a fraccionamiento con sarkosil frío, separando las proteínas en fracciones solubles e insolubles. Los niveles de insolubilidad y de ubiquitinación se cuantificaron para cada fracción insoluble, con normalización a la proteína homogeneizada total. Después se realizó un análisis de espectrometría de masas para identificar los contenidos de proteínas de las fracciones insolubles. La potencial importancia biológica de las proteínas detectadas fue evaluada utilizando análisis de enriquecimiento de Ontología Génica y el *Ingenuity Pathway Analysis*.

**Resultados:** Un subgrupo de los cerebros con esquizofrenia mostró un aumento de la insolubilidad y la ubiquitinación de

las proteínas en la fracción insoluble. La espectrometría de masas de la fracción insoluble reveló que los cerebros con insolubilidad y ubiquitinación aumentadas exhibían una expresión péptida similar por análisis de componentes principales. Las proteínas que fueron significativamente alteradas en la fracción insoluble fueron enriquecidas por rutas relacionadas con el reconocimiento de axones diana y el desarrollo y la función del sistema nervioso.

**Conclusiones:** Este estudio sugiere un proceso patológico relacionado con la insolubilidad de las proteínas para un subgrupo de pacientes con esquizofrenia. Determinar el mecanismo molecular de este subtipo de esquizofrenia podría resultar en una mejor comprensión de las rutas que subyacen el fenotipo clínico en algunos pacientes con enfermedad mental mayor y en una nosología e identificación mejoradas de objetivos terapéuticos nuevos.

(*Am J Psychiatry* 2019; 176:730–743)

## Dominios neurofuncionales derivados de la fenotipificación comportamental profunda en el trastorno por abuso de alcohol

Laura E. Kwako, Ph.D., Melanie L. Schwandt, Ph.D., Vijay A. Ramchandani, Ph.D., Nancy Diazgranados, M.D., George F. Koob, Ph.D., Nora D. Volkow, M.D., Carlos Blanco, M.D., Ph.D., David Goldman, M.D.

**Objetivo:** Los autores evaluaron si tres dominios neurofuncionales propuestos como críticos en el ciclo de la adicción, a saber la prominencia de los incentivos, la emocionalidad negativa y la función ejecutiva, podrían ser identificados por medio de análisis factorial de una muestra clínica fenotipificada profundamente.

**Método:** Se recogieron medidas clínicas, comportamentales y auto-reportadas de adicción, personalidad, cognición, comportamiento y de exposición a estrés en las etapas iniciales de la vida, como parte de un estudio de la historia natural y tamizaje de trastornos por consumo de alcohol en 454 individuos que representaban el espectro trastornos por consumo y consumo de alcohol. Se utilizó el enfoque de indicadores múltiples y causas múltiples (MIMIC, por sus siglas en inglés) para identificar predictores significativos de los factores latentes identificados por medio del análisis.

**Resultados:** Los resultados mostraron apoyo significativo para los modelos de tres y cuatro factores para explicar la variación biocomportamental en esta muestra de partici-

pantes con trastorno por consumo de alcohol y en los sujetos control, pero el modelo de tres factores demostró un mejor acoplamiento. Con algunos matices, incluyendo la correlación cruzada (falta de independencia) entre los tres factores, los factores correspondieron a la prominencia de los incentivos, la emocionalidad negativa y la función ejecutiva (control ejecutivo). El modelo MIMIC reveló que tanto la exposición al estrés en etapas tempranas de la vida como las variables sociodemográficas predecían estos factores.

**Conclusiones:** Estos hallazgos sugieren que tres dominios neurofuncionales correlacionados son importantes para el trastorno por consumo de alcohol. Es necesario seguir investigando para validar y estandarizar medidas de dominios neurofuncionales en el trastorno por consumo de alcohol, para extender estos hallazgos a otros trastornos adictivos y para revelar variaciones en ellos a la predisposición, el curso clínico, la respuesta al tratamiento, datos de neuroimágenes y otros indicadores psicofísicos.

*(Am J Psychiatry 2019; 176:744–753)*



## Los beneficios continuados del metilfenidato en TDAH después de 2 años en consulta clínica: Un ensayo de discontinuación, aleatorizado y controlado con placebo

Anne-Flore M. Matthijssen, M.Sc., Andrea Dietrich, Ph.D., Margreet Bierens, M.Sc., Renee Kleine Deters, M.Sc., Gigi H.H. van de Loo-Neus, M.D., Barbara J. van den Hoofdakker, Ph.D., Jan K. Buitelaar, M.D., Ph.D., Pieter J. Hoekstra, M.D., Ph.D.

**Objetivo:** Los beneficios del uso a largo plazo del tratamiento con metilfenidato en niños y adolescentes con trastorno por déficit de atención e hiperactividad (TDAH), como se prescribe frecuentemente en la consulta clínica, no son claros. Los autores investigaron si el metilfenidato sigue siendo beneficioso después de 2 años de uso.

**Método:** Noventa y cuatro niños y adolescentes (de edades entre 8 y 18 años) que habían recibido tratamiento en atención regular con metilfenidato por más de 2 años fueron asignados aleatoriamente a la continuación del tratamiento doble ciego por 7 semanas (36 o 54 mg/día de metilfenidato de liberación prolongada) o al retiro gradual en un período de 3 semanas, hasta 4 semanas de placebo. La medida primaria de resultados fue la escala de Evaluación de TDAH (ADHD-RS, por sus siglas en inglés) aplicada por el investigador; las medidas secundarias de resultados fueron la escala de mejora de Impresión Global Clínica aplicada por el investigador (CGI-I, por sus siglas en inglés) y la escala *Conners' Teacher Rating Scale-Revised: Short Form (CTRS-R:S)*. Se analizaron evaluaciones continuadas con un modelo mixto para análisis de medidas repetidas, y la escala CGI-I con una prueba de chi cuadrado.

**Resultados:** Las puntuaciones medias con la escala ADHD-RS al inicio del estudio para los grupos de continuación y discontinuación, respectivamente, fueron 21,4 (DE=9,7) y 19,6 (DE=8,9); después de 7 semanas, las puntuaciones medias fueron 21,9 (DE=10,8) y 24,7 (DE=11,4), con una diferencia significativa entre grupos en el cambio a lo largo del tiempo de  $-4,6$  (IC 95%=-8,7; -0,56) a favor del grupo que continuó con el tratamiento con metilfenidato. La subescala de inatención de la escala ADHD-RS y el índice de TDAH en la escala CTRS-R:S y la subescala de hiperactividad también se deterioraron significativamente más en el grupo de discontinuación. La escala CGI-I indicó empeoramiento en 40,4% del grupo de discontinuación, en comparación con 15,9% del grupo de continuación.

**Conclusiones:** El tratamiento continuado con metilfenidato sigue siendo efectivo después del uso a largo plazo. A algunos pacientes individuales, sin embargo, puede retirárseles el metilfenidato sin que experimenten ningún deterioro. Este hallazgo apoya las recomendaciones guía que los pacientes sean evaluados periódicamente para determinar si hay una necesidad continua del tratamiento con metilfenidato.

(*Am J Psychiatry* 2019; 176:754-762)
